# Supplementary material for: Prevalence of generalized joint hypermobility, musculoskeletal injuries, and chronic musculoskeletal pain among American university students
Source: PeerJ. 2019 Sep 11;7:e7625. doi: 10.7717/peerj.7625 (PMC6744937; doi:10.7717/peerj.7625)
Supplement: Supplemental Information 2 [file peerj-07-7625-s002.xlsx]

## Sheet: Sheet1
Gender	Ethnicity/Race	Beighton score
female	Hispanic	2
male	Hispanic, Caucasian/White	0
female	Hispanic	7
female	African-American/Black	4
female	African-American/Black	2
female	African-American/Black	4
female	Hispanic	4
female	Caucasian/White	1
female	Caucasian/White	3
female	Hispanic, Caucasian/White	4
female	African-American/Black	7
male	Caucasian/White, Asian	6
female	Caucasian/White	4
female	Caucasian/White	4
male	Caucasian/White	5
female	Caucasian/White	6
female	Caucasian/White	4
female	Caucasian/White	1
female	Caucasian/White	1
female	Caucasian/White	4
male	Caucasian/White	0
female	Caucasian/White	3
female	Hispanic	0
female	Caucasian/White	1
male	Caucasian/White	1
female	Caucasian/White	1
female	Caucasian/White	4
female	Caucasian/White	0
female	Caucasian/White	1
female	Caucasian/White	0
female	Hispanic, Caucasian/White	5
female	African-American/Black, Hispanic	1
male	African-American/Black	2
male	Caucasian/White, African-American/Black	1
female	Caucasian/White	3
female	Caucasian/White	0
male	Caucasian/White, Asian	2
female	Caucasian/White	2
female	Caucasian/White	1
female	Caucasian/White	4
female	Hispanic	0
female	Hispanic	1
male	Hispanic, Caucasian/White	1
female	Caucasian/White	0
female	Caucasian/White	3
male	Hispanic, Caucasian/White	6
female	Caucasian/White	0
male	Caucasian/White	2
female	Hispanic, Caucasian/White	0
female	Caucasian/White	1
female	Hispanic, Caucasian/White	1
male	Caucasian/White	2
male	Hispanic	2
male	African-American/Black	2
female	Caucasian/White	1
female	Caucasian/White	4
female	Caucasian/White	0
male	Caucasian/White	0
female	Caucasian/White	4
female	Caucasian/White	3
female	Asian	0
female	Caucasian/White	0
female	Caucasian/White	0
female	Caucasian/White	3
female	African-American/Black	5
female	Hispanic	3
female	Hispanic	3
male	Hispanic	9
male	Caucasian/White	5
female	Hispanic	6
female	Caucasian/White	3
female	Caucasian/White	3
female	Caucasian/White	2
female	Caucasian/White	0
female	Caucasian/White	3
male	Hispanic	3
female	Caucasian/White	4
male	Hispanic, Caucasian/White	2
male	Hispanic, Caucasian/White	2
male	Caucasian/White	2
male	Asian	2
female	Hispanic, Caucasian/White	5
female	Caucasian/White	5
female	African-American/Black	4
female	Caucasian/White	0
female	Caucasian/White	3
female	Caucasian/White, African-American/Black, Native American	1
female	Caucasian/White	0
female	Hispanic	2
female	African-American/Black	0
female	Caucasian/White	2
female	Caucasian/White	2
female	Caucasian/White	3
female	Caucasian/White	6
female	Caucasian/White	8
female	Caucasian/White	3
female	Caucasian/White	1
female	Caucasian/White	2
female	Caucasian/White	0
female	Caucasian/White	0
female	Caucasian/White	0
female	Caucasian/White	4
female	Caucasian/White	1
female	Caucasian/White	5
female	Caucasian/White	2
female	Caucasian/White	1
female	Caucasian/White	1
female	Caucasian/White	3
male	Caucasian/White	0
female	Caucasian/White	1
female	Caucasian/White	0
female	Caucasian/White	5
female	African-American/Black	9
female	Hispanic	5
female	Caucasian/White	2
female	Caucasian/White	1
female	Caucasian/White	1
female	Caucasian/White	4
female	Caucasian/White	3
female	African-American/Black	1
female	Caucasian/White	5
female	Caucasian/White	1
female	African-American/Black	2
female	Caucasian/White	2
male	Caucasian/White, Hispanic	1
male	Caucasian/White	0
female	Caucasian/White	4
female	Caucasian/White	5
male	Hispanic	0
female	White/Non-Hispanic	1
female	African-American/Black	6
female	Hispanic	1
male	Caucasian/White	4
male	Caucasian/White	0
female	Caucasian/White, Hispanic	0
female	Caucasian/White, Hispanic	7
female	Caucasian/White	1
female	Caucasian/White	0
female	non-Hispanic	3
female	African-American/Black	1
female	Asian	0
female	African-American/Black	0
male	Hispanic	0
male	Hispanic	2
male	African-American/Black	6
female	Caucasian/White	0
female	Caucasian/White	1
female	Caucasian/White	0
female	Caucasian/White	0
female	Caucasian/White	0
female	Caucasian/White	0
female	Caucasian/White	2
female	Caucasian/White	1
female	Caucasian/White	0
female	Caucasian/White	0
female	Caucasian/White	1
female	Caucasian/White	1
female	Caucasian/White	0
female	Filipino, Chinese	0
female	Caucasian/White	1
female	Caucasian/White	2
female	Hispanic	2
female	Caucasian/White	0
female	Caucasian/White	1
female	Caucasian/White	2
female	Caucasian/White	3
female	Caucasian/White	0
male	Caucasian/White	0
male	Hispanic, Caucasian/White	0
female	Caucasian/White	1
female	Caucasian/White	3
female	Caucasian/White	2
female	Hispanic	4
male	Hispanic	3
male	Caucasian/White	1
female	Caucasian/White	4
female	Hispanic	4
female	African-American/Black, Hispanic	5
male	Hispanic	6
female	Caucasian/White	3
male	Caucasian/White	3
male	Caucasian/White	5
male	Caucasian/White	3
female	Caucasian/White	5
male	Caucasian/White	0
female	Caucasian/White	3
female	Caucasian/White	1
female	African-American/Black	1
male	Caucasian/White	1
female	Caucasian/White	0
female	Caucasian/White	4
female	Caucasian/White	0
female	Caucasian/White	4
male	Caucasian/White	5
female	African-American/Black	5
female	Native American	0
female	Caucasian/White	0
male	Caucasian/White	3
female	Caucasian/White	3
female	Caucasian/White	3
female	Hispanic, Caucasian/White	0
female	African-American/Black	1
female	Caucasian/White	1
female	Caucasian/White	2
female	Caucasian/White	0
female	Caucasian/White	3
female	Caucasian/White	0
female	Caucasian/White	1
female	Caucasian/White	0
male	Caucasian/White	1
male	Caucasian/White	1
female	Caucasian/White	5
female	Caucasian/White	2
female	Hispanic	0
female	Asian	2
female	Caucasian/White	5
female	Caucasian/White	0
male	Caucasian/White, African-American/Black	0
female	Hispanic	0
female	Caucasian/White	1
female	Caucasian/White	1
female	Caucasian/White	4
female	South African	3
female	Hispanic, Caucasian/White	0
female	Caucasian/White	1
male	Caucasian/White	2
female	Caucasian/White	1
female	African-American/Black	3
female	Caucasian/White	7
female	Caucasian/White	3
male	Caucasian/White	1
male	Caucasian/White	0
female	Other(not specified)	0
female	Caucasian/White	0
male	Caucasian/White	0
female	Caucasian/White	2
female	Caucasian/White	8
male	Asian	2
female	Caucasian/White	3
female	Caucasian/White	1
male	African-American/Black	0
male	Hispanic	0
female	Hispanic, Caucasian/White	1
male	Caucasian/White	0
male	Caucasian/White	2
female	Caucasian/White, African-American/Black	2
male	Caucasian/White	3
female	Caucasian/White	0
female	African-American/Black	1
female	Caucasian/White	7
female	African-American/Black	0
female	Hispanic	2
female	Hispanic	2
male	African-American/Black	5
male	Hispanic, Caucasian/White	0
male	Caucasian/White	0
male	Caucasian/White	0
female	Asian	0
female	Asian	3
female	Caucasian/White	2
female	Caucasian/White	1
female	Caucasian/White	4
female	Caucasian/White	0
male	Caucasian/White	1
female	Caucasian/White	4
female	Caucasian/White	2
male	Hispanic	0
male	Caucasian/White	0
male	Caucasian/White	0
female	Caucasian/White	0
female	Caucasian/White	5
male	Hispanic	2
female	Hispanic, Caucasian/White	1
male	Caucasian/White	0
female	Hispanic	3
female	Caucasian/White	2
female	Caucasian/White	7
male	Caucasian/White	0
female	Hispanic	7
male	Hispanic	0
female	Caucasian/White	5
female	African-American/Black, non-Hispanic	3
female	Caucasian/White	1
female	Caucasian/White, non-Hispanic	1
female	Caucasian/White	1
female	Caucasian/White	2
female	Caucasian/White	1
female	Caucasian/White	3
female	Hispanic, Caucasian/White	0
female	African-American/Black, Indian	2
male	Caucasian/White	3
female	Caucasian/White, African-American/Black	0
female	Hispanic	3
female	Caucasian/White	8
male	Caucasian/White	0
female	Hispanic, Caucasian/White	1
female	Caucasian/White	3
male	Caucasian/White	0
female	Caucasian/White	2
female	Caucasian/White	0
female	Caucasian/White	1
female	Caucasian/White	1
male	Caucasian/White	2
female	Caucasian/White	3
female	Caucasian/White	1
female	Caucasian/White	0
female	Caucasian/White	3
female	Asian	5
female	Caucasian/White, Hispanic	4
female	Caucasian/White	1
female	Caucasian/White	1
female	Caucasian/White	3
female	Caucasian/White	3
male	Asian	0
male	Caucasian/White	1
female	Caucasian/White	5
female	Hispanic	0
female	Caucasian/White	0
female	Caucasian/White	0
female	Caucasian/White	0
female	Caucasian/White	0
female	Hispanic	4
female	Caucasian/White	1
female	Caucasian/White	1
female	Caucasian/White	3
female	Caucasian/White	2
female	African-American/Black	1
female	African-American/Black	5
female	Caucasian/White	5
female	Hispanic	2
female	Hispanic	0
female	Hispanic	5
male	African-American/Black	0
male	Caucasian/White	1
female	Caucasian/White	0
female	Caucasian/White	3
female	Caucasian/White	0
female	Caucasian/White	4
female	South African	2
female	Hispanic	1
female	Hispanic	5
female	Caucasian/White	2
female	African-American/Black	0
female	Caucasian/White	1
female	Hispanic	6
female	Caucasian/White	3
male	Caucasian/White	6
female	Asian	5
female	Caucasian/White	3
female	Caucasian/White	5
female	Caucasian/White	8
female	Caucasian/White	1
female	Caucasian/White	3
female	African-American/Black	0
male	Caucasian/White	4
male	Caucasian/White	0
female	Caucasian/White	1
female	Caucasian/White	0
female	Caucasian/White	1
female	Hispanic	3
female	African-American/Black	2
male	African-American/Black	1
female	African-American/Black	1
female	African-American/Black	1
male	Hispanic	3
female	Hispanic	5
male	Hispanic	5
male	Caucasian/White	1
female	Caucasian/White	0
male	Caucasian/White	0
female	Caucasian/White	5
female	Caucasian/White	0
female	Caucasian/White	2
female	Hispanic	5
female	Caucasian/White	0
male	Caucasian/White	0
female	Caucasian/White	6
male	African-American/Black	2
female	Hispanic	1
female	Caucasian/White	0
female	Hispanic	0
female	Caucasian/White	1
male	Caucasian/White	6
female	Caucasian/White	0
female	Caucasian/White	7
male	Caucasian/White	1
female	Caucasian/White	3
female	Caucasian/White	3
female	Caucasian/White	0
male	Hispanic	0
male	Caucasian/White	2
male	Hispanic	1
male	Caucasian/White	0
male	African-American/Black	0
male	African-American/Black	1
female	Caucasian/White	3
female	Caucasian/White	6
female	Asian	1
male	African-American/Black	5
male	Caucasian/White	0
male	Caucasian/White	2
male	Caucasian/White	2
male	Caucasian/White	0
female	Caucasian/White	2
female	Caucasian/White	1
male	Caucasian/White	1
male	Caucasian/White	2
female	Caucasian/White	2
male	Hispanic	0
female	Caucasian/White	1
female	Caucasian/White	1
female	Caucasian/White	2
female	Asian	1
female	Caucasian/White	0
male	Caucasian/White	0
male	Caucasian/White	0
male	Hispanic	0
female	Hispanic	5
male	Caucasian/White	2
female	African-American/Black	5
female	Caucasian/White	0
female	Caucasian/White	1
female	Caucasian/White	3
male	Hispanic	0
male	Caucasian/White	2
female	African-American/Black	3
female	Asian	0
female	African-American/Black	5
female	Caucasian/White	1
female	Caucasian/White	1
female	African-American/Black	1
male	Caucasian/White	0
male	Caucasian/White	8
female	Caucasian/White	1
male	Caucasian/White	0
male	Hispanic	2
male	Caucasian/White	0
female	Caucasian/White	3
male	African-American/Black	0
female	Caucasian/White	5
female	Hispanic	1
female	Hispanic	2
male	Caucasian/White	1
female	Caucasian/White	0
female	Caucasian/White	0
female	Caucasian/White, Hispanic	1
female	Caucasian/White	1
male	Caucasian/White	0
female	African-American/Black	1
male	Hispanic	0
male	African-American/Black	1
female	Caucasian/White	1
female	Caucasian/White	3
male	Caucasian/White	2
female	Caucasian/White	5
female	Caucasian/White	6
female	African-American/Black	4
male	Hispanic	0
female	Caucasian/White	2
female	Caucasian/White	5
male	Hispanic	1
female	Caucasian/White	2
male	Caucasian/White	0
female	Caucasian/White	2
female	Hispanic	4
female	Caucasian/White	0
female	Hispanic	0
female	Caucasian/White, Hispanic	2
female	Other: Asian American	2
female	Caucasian/White	1
female	Hispanic	3
female	Caucasian/White	1
female	Hispanic	3
male	Hispanic	2
male	Caucasian/White	0
female	Caucasian/White	3
female	Caucasian/White	3
female	Caucasian/White	1
female	Caucasian/White, African-American/Black	3
male	Caucasian/White	0
male	Caucasian/White	0
female	Caucasian/White	3
male	Caucasian/White	0
male	Caucasian/White, Hispanic	0
female	Caucasian/White, African-American/Black	0
female	Caucasian/White	2
female	Caucasian/White, Hispanic	5
female	Caucasian/White	0
female	Caucasian/White	3
female	African-American/Black	6
male	Caucasian/White, Hispanic	0
female	Caucasian/White	1
female	Caucasian/White	2
female	Caucasian/White	4
male	Caucasian/White	1
male	Caucasian/White	0
female	African-American/Black	0
female	Caucasian/White	1
male	Caucasian/White, non-Hispanic	0
female	Caucasian/White	0
male	Caucasian/White	4
female	Caucasian/White	0
female	Caucasian/White, Hispanic	1
male	other: mixed	0
male	Caucasian/White, Hispanic	4
male	Caucasian/White	1
female	African-American/Black	2
female	Caucasian/White, Hispanic	1
male	African-American/Black	1
female	Caucasian/White	0
female	Caucasian/White, Hispanic	0
male	Caucasian/White	0
male	Caucasian/White	0
female	Caucasian/White	5
male	Caucasian/White	0
female	Caucasian/White	1
female	Caucasian/White, Hispanic	4
female	Caucasian/White	1
female	Caucasian/White, Hispanic	5
female	Caucasian/White	0
female	Caucasian/White	1
female	Caucasian/White	1
male	Hispanic	2
female	Caucasian/White	1
female	Hispanic	1
female	Caucasian/White	1
female	Caucasian/White	2
female	Caucasian/White	3
female	Hispanic, Asian	0
female	Hispanic	3
female	Caucasian/White	1
male	Caucasian/White	1
female	Hispanic	8
female	Caucasian/White	1
female	African-American/Black	5
male	Caucasian/White	0
male	Hispanic	3
male	African-American/Black, Hispanic	0
female	Hispanic	4
male	Hispanic	0
male	Hispanic	0
female	Caucasian/White	3
female	Caucasian/White	2
male	Caucasian/White	0
male	Hispanic	1
male	African-American/Black	4
female	Caucasian/White	2
female	African-American/Black	3
female	Caucasian/White	4
male	Caucasian/White, Hispanic	3
female	Non-Hispanic, Asian	0
female	Caucasian/White	1
female	Caucasian/White	1
female	Caucasian/White	2
female	Caucasian/White	2
female	Caucasian/White	1
female	Caucasian/White	2
male	Caucasian/White, Hispanic	1
male	Caucasian/White	0
male	Caucasian/White	0
male	Caucasian/White	2
female	Caucasian/White	7
female	Caucasian/White	5
female	Caucasian/White	0
female	Caucasian/White	2
female	Caucasian/White	1
female	Caucasian/White	0
female	Caucasian/White	0
female	Caucasian/White, Hispanic	3
female	Caucasian/White	1
male	Caucasian/White	2
female	Caucasian/White	0
female	Caucasian/White	0
female	Caucasian/White, Hispanic	9
female	Asian	8
female	Hispanic	5
female	African-American/Black	2
male	Caucasian/White	0
female	Caucasian/White	1
female	Caucasian/White	1
female	Caucasian/White, Hispanic	3
female	Caucasian/ White	0
female	Caucasian/White	5
female	Caucasian/White	5
female	Caucasian/White	8
male	Caucasian/White	1
female	Hispanic	1
female	African-American/Black	1
male	Caucasian/White, Hispanic	1
female	Caucasian/White	2
female	Caucasian/White	7
female	Caucasian/White	1
female	African-American/Black	1
female	Caucasian/White	4
female	Caucasian/White	0
female	Caucasian/White	1
female	Caucasian/White	0
female	Caucasian/White	2
female	Caucasian/White, African-American/Black	2
female	Caucasian/White	0
female	Caucasian/White	1
female	Caucasian/White	1
female	Caucasian/White	1
male	Hispanic	0
female	African-American/Black	0
male	Caucasian/White	2
female	Caucasian/White	0
female	Latino	2
female	Hispanic	2
male	Hispanic	0
male	Caucasian/White	3
female	Caucasian/White	0
female	Caucasian/White, Native American	8
female	Hispanic	2
female	Hispanic	7
female	African-American/Black, Carribean	0
female	Caucasian/White	5
female	Hispanic	3
female	Caucasian/White	1
female	Caucasian/White	0
male	Caucasian/White	1
female	African-American/Black	1
female	Caucasian/White	1
male	Caucasian/White	1
female	Caucasian/White, African-American/Black	5
male	Hispanic	1
male	Hispanic	0
female	Caucasian/White, Hispanic	6
female	Caucasian/White	3
male	Caucasian/White, Portuguese	0
female	Caucasian/White	1
female	Caucasian/White	3
female	Iranian	1
female	Caucasian/White	5
female	Caucasian/White	4
female	Caucasian/White	2
male	Caucasian/White	2
female	Hispanic	3
female	Caucasian/White	1
female	Caucasian/White	3
female	Caucasian/White	7
female	Caucasian/White, African-American/Black	5
female	African-American/Black, Hispanic	4
female	Caucasian/White	3
female	African-American/Black	2
female	Caucasian/White	6
female	Caucasian/White	1
male	Caucasian/White	4
female	Caucasian/White	0
female	Hispanic, Asian	0
female	Hispanic	1
male	Caucasian/White, Hispanic	0
male	Hispanic	1
female	Caucasian/White	1
