# Supplementary material for: Prevalence of generalized joint hypermobility, musculoskeletal injuries, and chronic musculoskeletal pain among American university students
Source: PeerJ. 2019 Sep 11;7:e7625. doi: 10.7717/peerj.7625 (PMC6744937; doi:10.7717/peerj.7625)
Supplement: Supplemental Information 3 [file peerj-07-7625-s003.xlsx]

## Sheet: Sheet1
Gender	Beighton score	ICD 10
female	2	S83
male	0	S43
male	0	S62
male	0	S83
female	4	S76
female	2	S83
female	2	S93
female	4	S93
Female	3
female	4	S76
male	6	S93
female	4	S93
female	4	S93
Female	4
female	1	S63
female	1	S86
female	1	S73
female	1	S82
female	3	S76
female	3	S76
female	3	S93
female	1	S76
female	1	S83
male	1	S83
male	1	S93
female	1	S52
female	1	S63
male	1	S62
female	2	S56
female	2	S86
female	2	S93
male	1	S43
male	1	S93
male	6	S62
male	6	S93
male	2	S93
male	2	S43
male	2	S86
male	2	S43
female	1	S83
female	1	S83
female	1	S83
female	1	S83
female	4	S53
female	4	S53
female	0	S46
female	0	S76
female	0	S76
female	0	S93
female	3	S43
female	3	S82
female	5	S76
female	5	S83
female	5	S93
male	9	S63
male	9	S76
male	9	S93
male	5	S76
female	2	S63
female	2	S93
female	3	S76
female	3	S93
male	3	S62
male	3	S93
female	4	S76
female	4	S83
female	4	S83
male	2	S93
male	2	S76
male	2	S76
male	2	S83
male	2	S86
male	2	S53
female	5	S93
female	4	S43
female	4	S76
female	4	S76
female	4	S86
female	0	S46
female	3	S76
female	3	S76
female	3	S86
female	0	S76
Female	0	S93
female	2	S76
female	2	S93
female	6	S62
female	6	S76
female	6	S93
female	8	S93
female	3	S83
female	2	S63
female	2	S76
female	0	S93
female	4	S52
female	4	S93
female	1	S73
female	1	S76
female	1	S86
Female	1	S43
female	3	S03
male	0	S43
Female	5	S93
female	1	S83
female	1	S62
Female	4
female	3	S82
female	5	S62
female	5	S82
female	5	S76
male	4	S76
male	0	S43
female	0	S76
female	1	S83
female	1	S76
female	1	S76
female	0	S62
female	0	S83
male	0	S86
male	0	S93
male	6	S83
female	0	S76
female	0	S93
Female	0	S93
female	0	S62
Female	2	S93
female	1	S93
female	0	S76
female	1	S39
female	0	S62
Female	0	S93
female	1	S93
female	2	S29
female	0	S76
female	0	S82
female	0	S93
female	1	S93
female	0	S76
male	0	S76
female	1	S76
female	4	S76
female	4	S83
Male	3	S53
female	5	S82
female	5	S83
female	5	S93
female	3	S76
female	3	S76
female	3	S76
female	3	S83
male	3	S76
male	5	S62
male	5	S76
male	5	S76
male	5	S76
male	3	S76
male	3	S83
male	3	S83
male	3	S83
male	3	S83
female	5
female	5	S86
male	0	S43
male	0	S93
female	3	S76
female	3	S93
female	1	S76
female	1	S93
female	1	S83
male	1	S39
male	1	S76
female	0	S62
female	0	S93
female	4	S93
female	0	S43
female	0	S93
male	5	S63
female	0	S39
female	0	S63
female	0	S63
female	0	S76
female	0	S82
female	0	S83
female	0	S83
female	0	S83
female	0	S63
male	3	S76
male	3	S76
male	3	S76
male	3	S86
female	3	S93
female	0	S76
female	1	S62
female	0	S83
female	0	S83
male	1	S86
male	1	S83
male	1	S83
female	0	S93
female	2	S52
Female	5
female	1	S83
female	4	S43
female	4	S83
female	1	S93
male	2	S43
male	2	S76
female	1	S39
female	1	S63
female	1	S76
male	1
male	1	S93
female	0	S39
male	0	S43
male	0	S76
female	2	S83
female	2	S83
male	2	S93
female	3	S39
female	3	S76
female	3	S93
Female	1
male	0	S76
male	0	S83
male	3	S53
female	7	S82
male	0	S63
male	0	S83
female	0	S93
female	3	S86
female	1	S86
female	0	S53
female	4	S76
male	0	S39
male	0	S63
male	0	S43
male	0	S83
male	0	S43
male	0	S43
male	0	S62
male	0	S76
male	0	S76
female	5	S29
female	5	S62
female	5	S93
female	1	S93
female	2	S53
female	7	S82
female	1	S82
female	1	S93
female	1	S76
female	1	S93
female	2	S42
female	2	S83
female	1	S83
female	3	S39
female	3	S62
female	3	S63
female	3	S93
female	0	S63
female	0	S76
female	2	S76
male	3	S53
female	0	S03
female	0	S63
female	0	S76
female	0	S82
female	0	S83
female	1	S83
female	3	S76
female	3	S83
male	0	S93
female	0	S93
male	2
male	2	S83
female	3	S93
female	1	S63
female	0	S82
female	3	S83
female	3	S83
female	3	S83
female	3	S83
female	5	S86
female	4	S62
female	4	S76
female	4	S82
female	1	S29
female	1	S43
female	1	S62
female	1	S63
female	1	S93
female	1	S43
Female	3
male	0	S43
male	0	S93
female	0	S76
female	0	S62
female	1	S16
female	3	S63
female	3	S83
female	3	S93
female	2	S93
female	1	S93
female	5	S29
female	2	S93
female	0	S43
male	1	S43
male	1	S86
female	0	S76
female	0	S76
female	0	S53
female	4	S93
female	2	S93
Female	5
female	1	S76
female	1	S83
Female	3
male	6	S76
female	5	S82
female	3	S62
female	3	S76
female	3	S93
female	1	S62
female	1	S76
female	1	S83
female	3	S76
Male	4
Male	4
Male	4
male	0	S43
male	0	S83
female	1	S76
female	1	S82
female	1	S93
female	0	S76
female	0	S83
female	0	S83
female	0	S83
female	1	S76
female	1	S83
female	1	S83
female	1	S83
female	3	S93
female	2	S52
female	2	S62
male	1	S76
female	1	S76
female	1	S93
female	1	S83
male	3	S76
female	5	S93
male	5	S62
male	5	S93
male	1	S76
female	5	S62
female	5	S76
female	0	S46
female	2	S83
female	0	S86
male	0	S52
male	0	S76
female	1	S76
male	1	S62
male	1	S63
female	3	S76
female	3	S76
female	3	S93
male	0	S83
male	2	S43
male	2	S83
male	1	S76
male	1	S93
male	0	S62
male	0	S76
male	0	S93
male	1	S83
female	6	S83
female	1	S93
male	5	S43
male	5	S83
male	5	S83
male	5	S83
male	0	S76
male	2	S82
male	2	S93
male	2	S76
male	0	S63
male	0	S83
female	1	S76
male	1	S76
male	2	S82
female	2	S76
female	1	S43
female	2	S43
female	0	S93
male	0	S29
male	0	S83
male	0	S83
male	0	S76
female	5
female	5	S76
male	2	S43
male	0	S83
male	2	S76
male	2	S93
female	3	S83
female	0	S93
female	1	S53
female	1	S76
female	1	S43
female	1	S53
female	1	S76
female	1	S76
female	1	S76
female	1	S83
female	1	S93
female	1	S93
male	0	S83
male	0	S83
male	1	S93
female	1	S93
male	0	S62
male	0	S76
female	1	S53
female	1	S63
female	1	S76
female	1	S93
female	1	S43
female	3	S43
female	3	S93
male	2	S82
male	2	S83
female	6	S76
male	0	S86
female	5	S76
female	5	S93
Male	1
female	2	S76
male	0	S63
female	2	S52
female	2	S83
Female	3
female	3	S39
female	3	S93
Male	0
Male	0
Male	0
male	0	S62
male	0	S76
male	0	S76
male	0	S83
Male	0	S63
male	0	S93
male	0	S76
female	2	S83
Female	5
Female	5
Female	5	S43
Female	5	S83
female	3	S62
female	6	S76
female	6	S83
female	1	S86
male	1	S76
female	0	S62
female	1	S76
male	0	S43
male	0	S76
male	0	S93
female	0	S43
female	0	S83
male	4	S76
male	4	S16
male	1	S76
male	1	S76
female	2	S93
female	1	S93
female	0	S76
male	0	S43
male	0	S76
male	0	S93
female	5	S83
female	5	S83
female	5	S83
male	0	S39
female	1	S83
female	5	S86
female	1	S93
female	2	S83
female	3	S76
female	0	S76
female	1	S93
female	1	S76
female	1	S86
male	0	S52
male	3	S63
male	3	S76
male	3	S83
female	4	S76
female	4	S83
female	4	S93
male	1	S43
male	1	S76
male	1	S93
male	4	S63
male	4	S76
female	2	S63
female	4	S82
female	4	S93
male	3	S43
male	3	S46
female	1	S93
female	2	S76
female	2	S83
female	2	S16
male	2	S43
Female	7	S63
Female	7	S83
female	0	S63
female	2	S76
female	1
female	1	S43
female	1	S83
female	1	S86
female	3	S76
male	2	S43
male	2	S76
male	2	S83
male	2	S83
male	0	S29
female	1	S63
female	1	S76
female	1	S76
female	3	S52
female	0	S86
female	5	S93
female	8	S83
female	8	S83
male	1	S63
male	1	S86
male	1	S93
female	1	S63
female	1	S76
female	1	S93
male	1	S76
male	1	S76
female	2	S43
female	2	S63
female	2	S73
female	2	S93
female	1	S29
female	1	S83
female	4	S76
female	4	S83
female	1	S76
female	1	S93
female	0	S76
female	2	S86
female	1	S83
female	1	S83
female	1	S76
female	1	S93
male	0	S76
male	2	S76
female	0	S76
male	0	S76
male	3	S43
female	8	S53
female	0	S93
female	1	S43
female	0	S52
male	1	S93
male	1	S86
female	5	S83
female	3	S83
female	3	S83
female	3	S83
male	2	S76
male	2	S83
female	3	S53
female	3	S76
female	3	S93
female	3	S39
female	3	S82
female	3	S93
female	7	S76
female	7	S76
female	7	S82
female	7	S83
female	7	S93
female	5	S93
female	4
female	4	S63
female	4	S93
female	3	S52
female	3	S93
female	2	S83
female	2	S83
female	6	S43
female	6	S62
female	6	S76
female	6	S76
female	6	S82
female	6	S83
female	6	S83
female	6	S86
male	4	S43
female	0	S63
female	0	S93
male	1	S29
female	1	S39
